# Supplementary material
Source: PubMed Central journal article supplement (PMC2757159)

## **SUPPLEMENTARY FIGURE LEGENDS**

**Supplementary Figure 1** Calcium-mediated crystal packing interactions in the C222<sub>1</sub>.

A) The “trimer of dimers” crystal packing motif frequently observed in structures of SOD1. B) Two distinct types of calcium-mediated crystal contacts (boxed and circled) connecting layers in the C222<sub>1</sub> crystal form. C) Close-up of the calcium-mediated interactions shown in panel B).

**Supplementary Figure 2** Analytical ultracentrifugation and gel filtration of

H46R/H48Q SOD1. A) van Holde and Weischet plots of sedimentation velocity data probing  $\gamma$ CCS and H46RH48Q interactions in solution. B) Metal-free, reduced H46R/H48Q SOD1 elutes as a dimer in gel filtration experiments.

# Supplementary Figure 1

A)

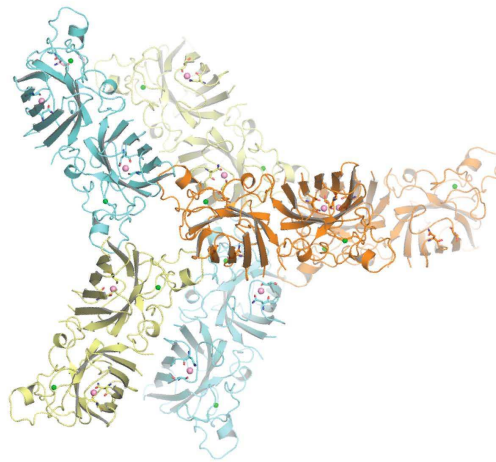

90°

B)

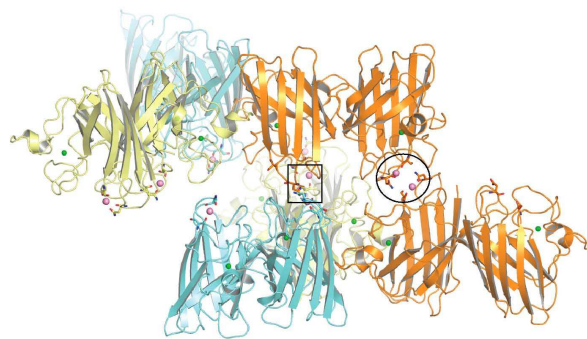

C)

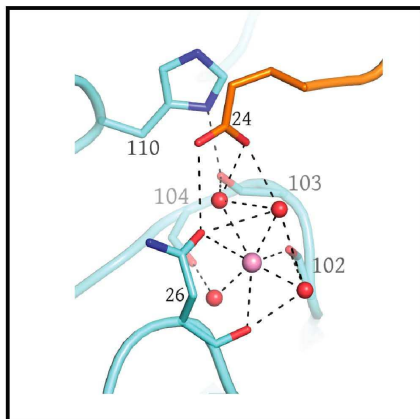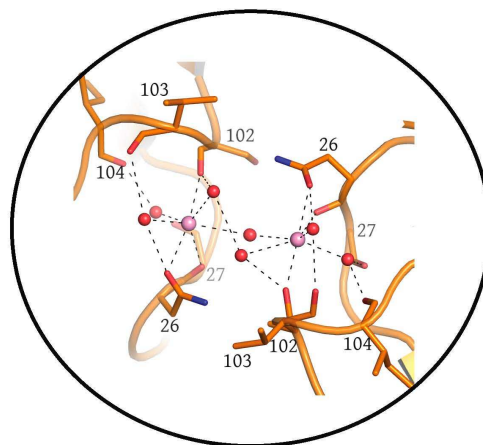

## Supplementary Figure 2

A)

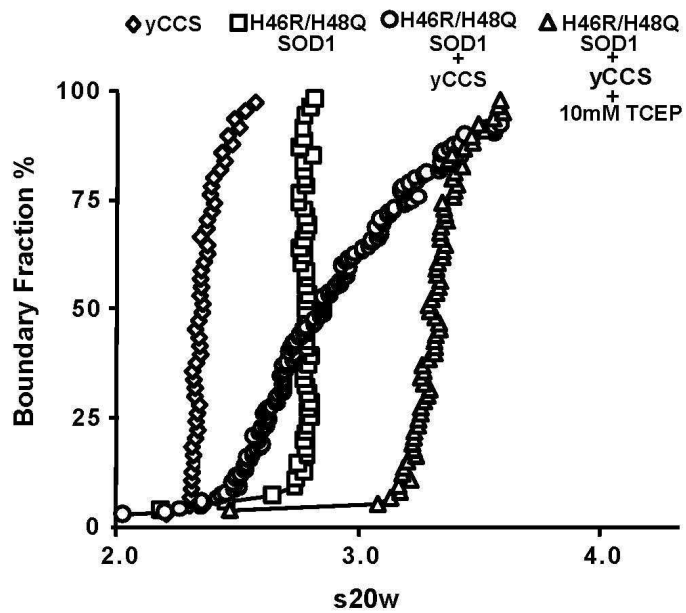

B)

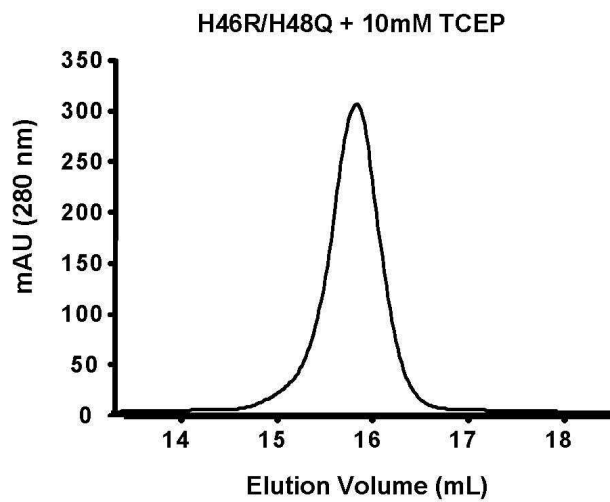

Supplement: NIHMS108624-supplement-1_si_001.pdf [file NIHMS108624-supplement-1_si_001.pdf]
